# Supplementary material for: Overcoming efficiency and stability limits in water-processing nanoparticular organic photovoltaics by minimizing microstructure defects
Source: PubMed Central journal article supplement (PMC6297219; doi:10.1038/s41467-018-07807-5), 2018-12-17
Supplement: 41467_2018_7807_MOESM3_ESM.pdf [file 41467_2018_7807_MOESM3_ESM.pdf]

## Solar Cells Reporting Summary

Nature Research wishes to improve the reproducibility of the work that we publish. This form is intended for publication with all accepted papers reporting the characterization of photovoltaic devices and provides structure for consistency and transparency in reporting. Some list items might not apply to an individual manuscript, but all fields must be completed for clarity.

For further information on Nature Research policies, including our [data availability policy](#), see [Authors & Referees](#).

### ► Experimental design

#### Please check: are the following details reported in the manuscript?

##### 1. Dimensions

|                                          |                                                                        |                                                                                                                                                                 |
|------------------------------------------|------------------------------------------------------------------------|-----------------------------------------------------------------------------------------------------------------------------------------------------------------|
| Area of the tested solar cells           | <input checked="" type="checkbox"/> Yes<br><input type="checkbox"/> No | <input type="text" value="Described in Methods, section 'Device'."/><br><input type="text" value="Explain why this information is not reported/not relevant."/> |
| Method used to determine the device area | <input checked="" type="checkbox"/> Yes<br><input type="checkbox"/> No | <input type="text" value="Described in Methods, section 'Device'."/><br><input type="text" value="Explain why this information is not reported/not relevant."/> |

##### 2. Current-voltage characterization

|                                                                                                                                                                                |                                                                        |                                                                                                                                                                                   |
|--------------------------------------------------------------------------------------------------------------------------------------------------------------------------------|------------------------------------------------------------------------|-----------------------------------------------------------------------------------------------------------------------------------------------------------------------------------|
| Current density-voltage (J-V) plots in both forward and backward direction                                                                                                     | <input type="checkbox"/> Yes<br><input checked="" type="checkbox"/> No | <input type="text" value="State where this information can be found in the text."/><br><input type="text" value="Solar cells were evaluated in forward direction"/>               |
| Voltage scan conditions<br><i>For instance: scan direction, speed, dwell times</i>                                                                                             | <input checked="" type="checkbox"/> Yes<br><input type="checkbox"/> No | <input type="text" value="Described in Methods, section 'Device'."/><br><input type="text" value="Explain why this information is not reported/not relevant."/>                   |
| Test environment<br><i>For instance: characterization temperature, in air or in glove box</i>                                                                                  | <input checked="" type="checkbox"/> Yes<br><input type="checkbox"/> No | <input type="text" value="Described in Methods, section 'Device'."/><br><input type="text" value="Explain why this information is not reported/not relevant."/>                   |
| Protocol for preconditioning of the device before its characterization                                                                                                         | <input type="checkbox"/> Yes<br><input checked="" type="checkbox"/> No | <input type="text" value="State where this information can be found in the text."/><br><input type="text" value="No preconditioning of the device before its characterization."/> |
| Stability of the J-V characteristic<br><i>Verified with time evolution of the maximum power point or with the photocurrent at maximum power point; see ref. 7 for details.</i> | <input checked="" type="checkbox"/> Yes<br><input type="checkbox"/> No | <input type="text" value="Provided in Fig. 4g."/><br><input type="text" value="Explain why this information is not reported/not relevant."/>                                      |

##### 3. Hysteresis or any other unusual behaviour

|                                                                           |                                                                        |                                                                                                                                          |
|---------------------------------------------------------------------------|------------------------------------------------------------------------|------------------------------------------------------------------------------------------------------------------------------------------|
| Description of the unusual behaviour observed during the characterization | <input type="checkbox"/> Yes<br><input checked="" type="checkbox"/> No | <input type="text" value="State where this information can be found in the text."/><br><input type="text" value="No unusual behavior."/> |
| Related experimental data                                                 | <input type="checkbox"/> Yes<br><input checked="" type="checkbox"/> No | <input type="text" value="State where this information can be found in the text."/><br><input type="text" value="No unusual behavior."/> |

##### 4. Efficiency

|                                                                                                                                 |                                                                        |                                                                                                                                                                            |
|---------------------------------------------------------------------------------------------------------------------------------|------------------------------------------------------------------------|----------------------------------------------------------------------------------------------------------------------------------------------------------------------------|
| External quantum efficiency (EQE) or incident photons to current efficiency (IPCE)                                              | <input checked="" type="checkbox"/> Yes<br><input type="checkbox"/> No | <input type="text" value="Provided in Fig. 4 and Fig. 5"/><br><input type="text" value="Explain why this information is not reported/not relevant."/>                      |
| A comparison between the integrated response under the standard reference spectrum and the response measure under the simulator | <input checked="" type="checkbox"/> Yes<br><input type="checkbox"/> No | <input type="text" value="Provided in Supplementary Table 5."/><br><input type="text" value="Explain why this information is not reported/not relevant."/>                 |
| For tandem solar cells, the bias illumination and bias voltage used for each subcell                                            | <input type="checkbox"/> Yes<br><input checked="" type="checkbox"/> No | <input type="text" value="State where this information can be found in the text."/><br><input type="text" value="No tandem solar cells are involved in this manuscript."/> |

##### 5. Calibration

|                                                                         |                                                                        |                                                                                                                                                                 |
|-------------------------------------------------------------------------|------------------------------------------------------------------------|-----------------------------------------------------------------------------------------------------------------------------------------------------------------|
| Light source and reference cell or sensor used for the characterization | <input checked="" type="checkbox"/> Yes<br><input type="checkbox"/> No | <input type="text" value="Described in Methods, section 'Device'."/><br><input type="text" value="Explain why this information is not reported/not relevant."/> |
|-------------------------------------------------------------------------|------------------------------------------------------------------------|-----------------------------------------------------------------------------------------------------------------------------------------------------------------|

|                                                                                                                                                                                               |                                         |                                                                                                                                                                                                            |
|-----------------------------------------------------------------------------------------------------------------------------------------------------------------------------------------------|-----------------------------------------|------------------------------------------------------------------------------------------------------------------------------------------------------------------------------------------------------------|
| Confirmation that the reference cell was calibrated and certified                                                                                                                             | <input checked="" type="checkbox"/> Yes | Described in Methods, section "Device".                                                                                                                                                                    |
|                                                                                                                                                                                               | <input type="checkbox"/> No             | <i>Explain why this information is not reported/not relevant.</i>                                                                                                                                          |
| Calculation of spectral mismatch between the reference cell and the devices under test                                                                                                        | <input type="checkbox"/> Yes            | <i>State where this information can be found in the text.</i>                                                                                                                                              |
|                                                                                                                                                                                               | <input checked="" type="checkbox"/> No  | Spectral mismatch was not calculated. The intensity of solar simulator was adjusted using a standard Si diode, as described in Methods.                                                                    |
| <b>6. Mask/aperture</b>                                                                                                                                                                       |                                         |                                                                                                                                                                                                            |
| Size of the mask/aperture used during testing                                                                                                                                                 | <input checked="" type="checkbox"/> Yes | Described in Methods, section "Device".                                                                                                                                                                    |
|                                                                                                                                                                                               | <input type="checkbox"/> No             | <i>Explain why this information is not reported/not relevant.</i>                                                                                                                                          |
| Variation of the measured short-circuit current density with the mask/aperture area                                                                                                           | <input type="checkbox"/> Yes            | <i>State where this information can be found in the text.</i>                                                                                                                                              |
|                                                                                                                                                                                               | <input checked="" type="checkbox"/> No  | Only the 0.104 cm <sup>2</sup> mask was used for evaluation.                                                                                                                                               |
| <b>7. Performance certification</b>                                                                                                                                                           |                                         |                                                                                                                                                                                                            |
| Identity of the independent certification laboratory that confirmed the photovoltaic performance                                                                                              | <input type="checkbox"/> Yes            | <i>State where this information can be found in the text.</i>                                                                                                                                              |
|                                                                                                                                                                                               | <input checked="" type="checkbox"/> No  | The highest efficiency value in this work is 7.5 %, which is not a high performance in today's OPV. This work focuses on the fundamental characterizations and device physics of nanoparticle solar cells. |
| A copy of any certificate(s)<br><i>Provide in Supplementary Information</i>                                                                                                                   | <input type="checkbox"/> Yes            | <i>State where this information can be found in the text.</i>                                                                                                                                              |
|                                                                                                                                                                                               | <input checked="" type="checkbox"/> No  | Not certificate.                                                                                                                                                                                           |
| <b>8. Statistics</b>                                                                                                                                                                          |                                         |                                                                                                                                                                                                            |
| Number of solar cells tested                                                                                                                                                                  | <input checked="" type="checkbox"/> Yes | Described in Methods, section "Device".                                                                                                                                                                    |
|                                                                                                                                                                                               | <input type="checkbox"/> No             | <i>Explain why this information is not reported/not relevant.</i>                                                                                                                                          |
| Statistical analysis of the device performance                                                                                                                                                | <input checked="" type="checkbox"/> Yes | Provided in Table 1.                                                                                                                                                                                       |
|                                                                                                                                                                                               | <input type="checkbox"/> No             | <i>Explain why this information is not reported/not relevant.</i>                                                                                                                                          |
| <b>9. Long-term stability analysis</b>                                                                                                                                                        |                                         |                                                                                                                                                                                                            |
| Type of analysis, bias conditions and environmental conditions<br><i>For instance: illumination type, temperature, atmosphere humidity, encapsulation method, preconditioning temperature</i> | <input checked="" type="checkbox"/> Yes | Described in Methods, section "Device".                                                                                                                                                                    |
|                                                                                                                                                                                               | <input type="checkbox"/> No             | <i>Explain why this information is not reported/not relevant.</i>                                                                                                                                          |
